# Supplementary material for: Local Concentrations of TGF-β1 and IGF-1 Appear Determinant in Regulating Bone Regeneration in Human Postextraction Tooth Sockets
Source: MDPI journal article supplement (doi:10.3390/ijms24098239), 2023-05-04
Supplement: s1 [file s1]

# Supplementary Material for:

Article

## Local concentrations of TGF- $\beta$ 1 and IGF-1 appear determinant in regulating bone regeneration in human postextraction tooth sockets

Maria B. Asparuhova <sup>1,2,\*</sup>, Dominic Riedwyl <sup>1,2</sup>, Ryo Aizawa <sup>1,2,3</sup>, Clemens Raabe <sup>2</sup>, Emilio Couso-Queiruga <sup>2</sup> and Vivianne Chappuis <sup>2</sup>

<sup>1</sup> Laboratory of Oral Cell Biology, Dental Research Center, School of Dental Medicine, University of Bern, Freiburgstrasse 3, 3010 Bern, Switzerland; mariya.asparuhova@unibe.ch; dominic.riedwyl@unibe.ch

<sup>2</sup> Department of Oral Surgery and Stomatology, School of Dental Medicine, University of Bern, Freiburgstrasse 7, 3010 Bern, Switzerland; clemens.raabe@unibe.ch; emilio.couso@unibe.ch; vivianne.chappuis@unibe.ch

<sup>3</sup> Department of Periodontology, School of Dentistry, Showa University, 2-1-1 Kitasenzoku, Ohta-ku, Tokyo 145-8515, Japan; r-aizawa@dent.showa-u.ac.jp

\* Correspondence: mariya.asparuhova@unibe.ch

**Figure S1:** No significant changes in the expression of genes encoding (a) FGF-2 and its receptors, and (b) BMP-2, -4, -7 and their receptors in ESsT and CTG samples.

**Figure S2:** No significant changes in cell viability and proliferation of primary ESsT-Cs and CTG-Fs subjected to intermittent equibiaxial cyclic strain.

**Figure S3:** Morphological appearance and actin stress fiber formation in primary ESsT-Cs and CTG-Fs subjected to intermittent equibiaxial cyclic strain.

**Figure S4:** No significant changes in cell viability and proliferation of primary ESsT-Cs and CTG-Fs grown on soft (0.5 kPa) or stiff (12 or 50 kPa) matrices.

**Figure S5:** Morphological appearance and actin stress fiber formation in primary ESsT-Cs and CTG-Fs grown on soft (0.5 kPa) or stiff (12 or 50 kPa) matrices.

**Table S1:** Primer sequences for osteogenic marker genes.

**Table S2:** Primer sequences for genes encoding extracellular matrix proteins.

**Table S3:** Primer sequences encoding isoforms of FGF and BMP and their receptors.

**Table S4:** Primer sequences encoding isoforms of TGF- $\beta$  and IGF and their receptors.

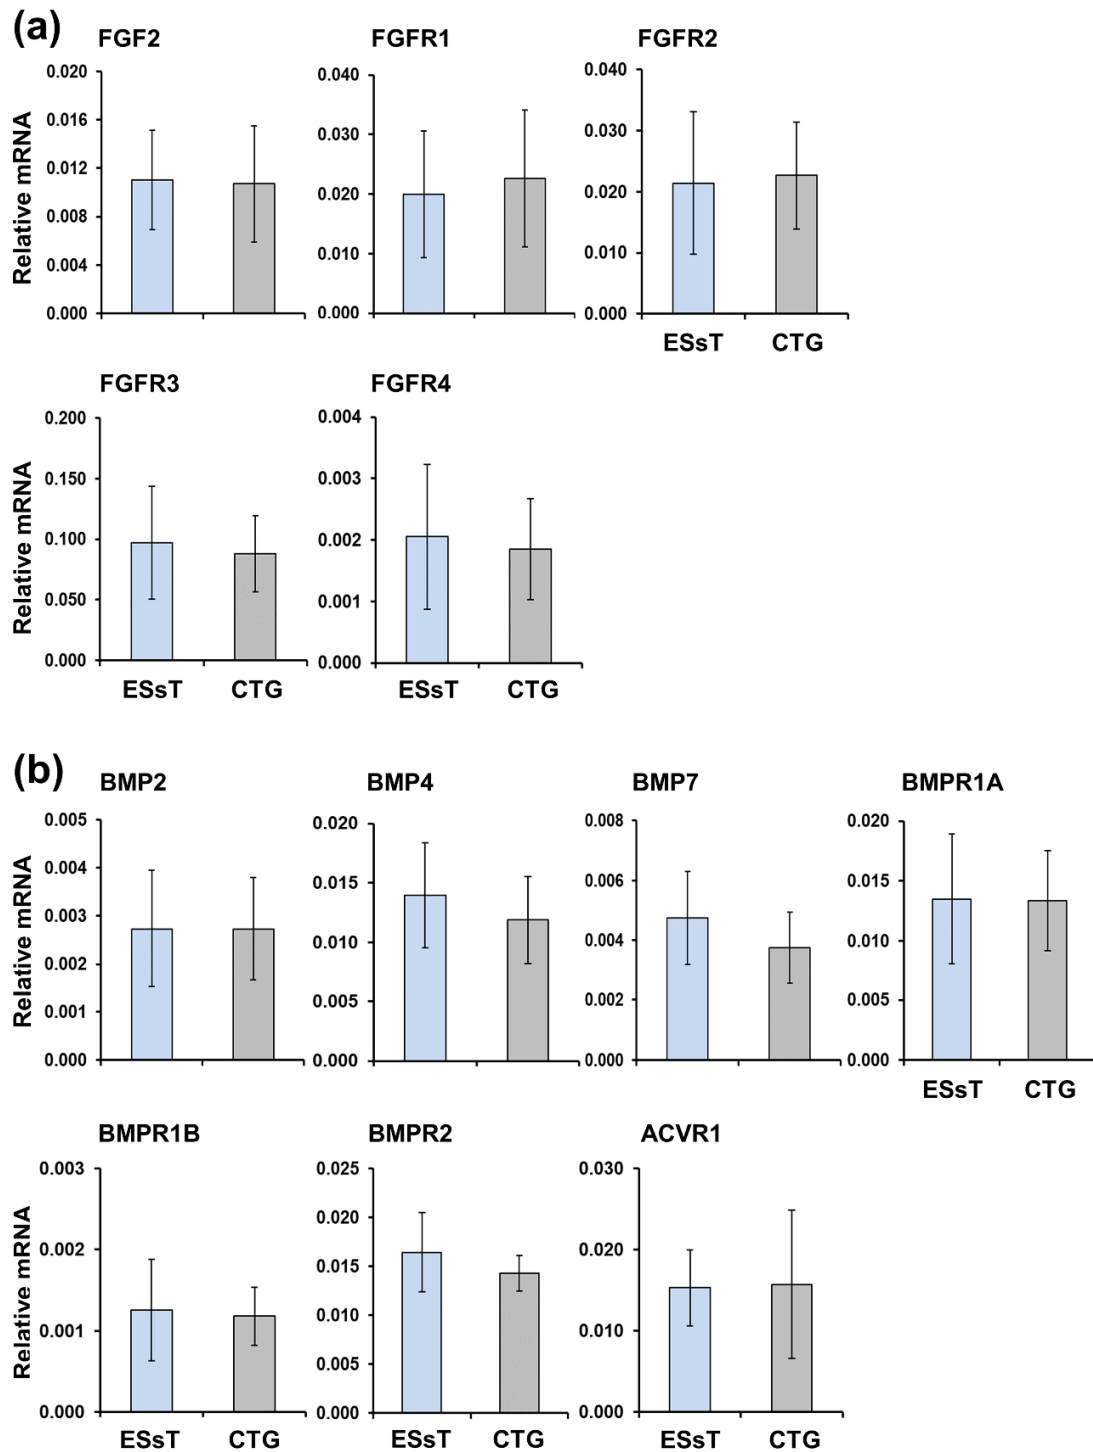

**Figure S1.** No significant changes in the expression of genes encoding (a) FGF-2 and its receptors, and (b) BMP-2, -4, -7 and their receptors in ESsT and CTG samples. qRT-PCR analyses of (a) FGF2, FGFR1, FGFR2, FGFR3, FGFR4, and (b) BMP2, BMP4, BMP7, BMPR1A, BMPR1B, BMPR2, ACVR1 (encoding activin A receptor, type I) transcripts normalized to GAPDH in the ESsT and CTG samples. Means  $\pm$  SD for 6 patients are shown.

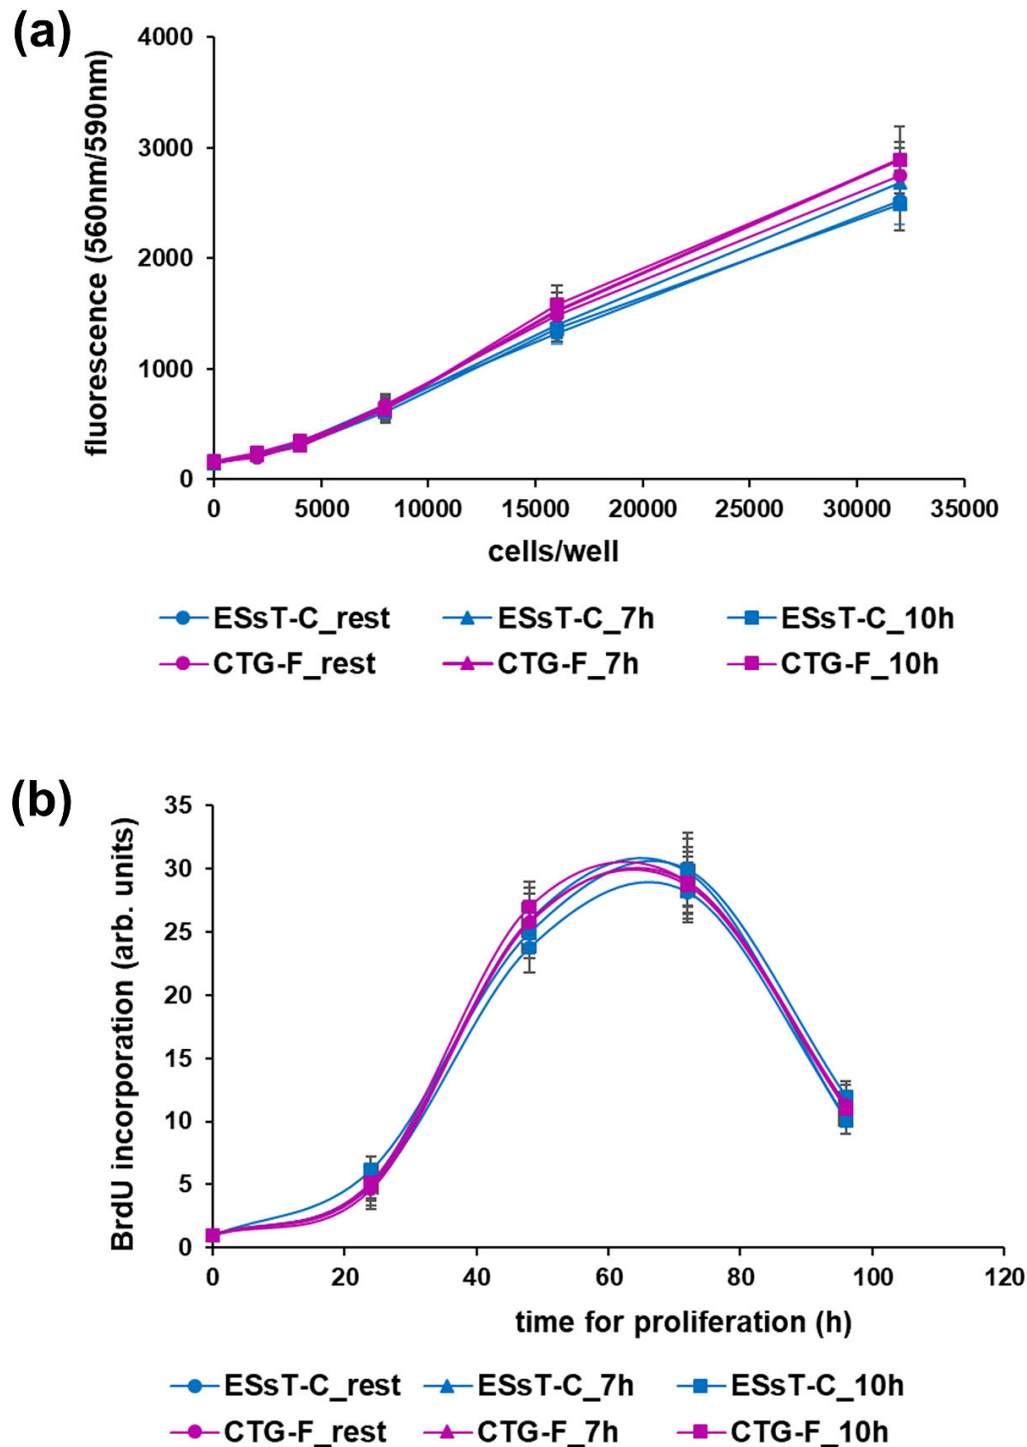

**Figure S2.** No significant changes in cell viability and proliferation of primary ESsT-Cs and CTG-Fs subjected to intermittent equibiaxial cyclic strain. ESsT-Cs and CTG-Fs cultured on fibronectin-coated silicone membranes were left at rest (no mechanical stimulation) or cyclically strained as described in Figure 3a in the main text, and then subjected to the CellTiter-Blue cell viability assay (a) and the BrdU Cell Proliferation ELISA (b) according to the manufacturers' protocols.

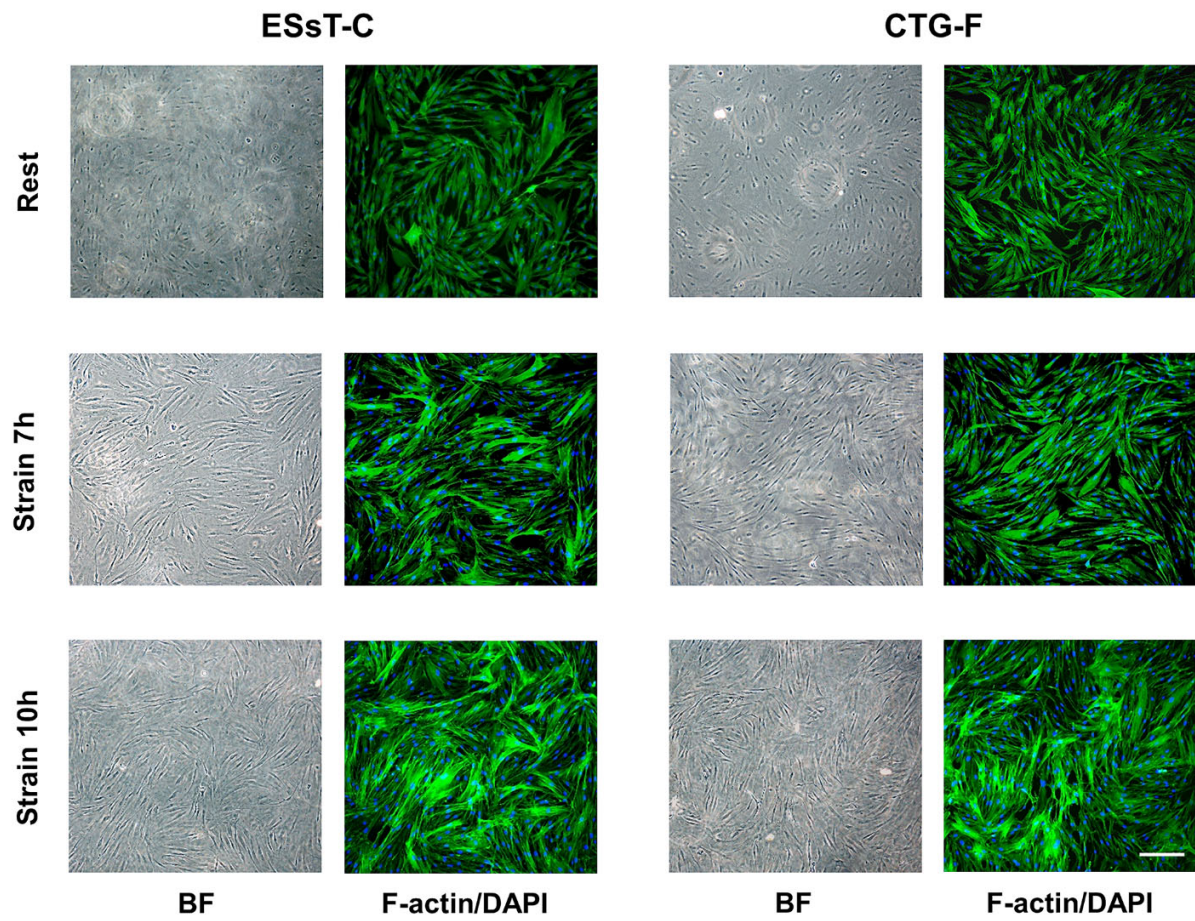

**Figure S3.** Morphological appearance and actin stress fiber formation in primary ESsT-Cs and CTG-Fs subjected to intermittent equibiaxial cyclic strain. Primary ESsT-Cs and CTG-Fs cultured on fibronectin-coated silicone membranes were left at rest (no mechanical stimulation) or cyclically strained, fixed, and stained with Alexa Fluor 488-labeled phalloidin (green) for actin stress fibers. The cell nuclei were localized via DAPI co-stain (blue); a bright field (BF) image is also shown. Scale bar, 500  $\mu\text{m}$ .

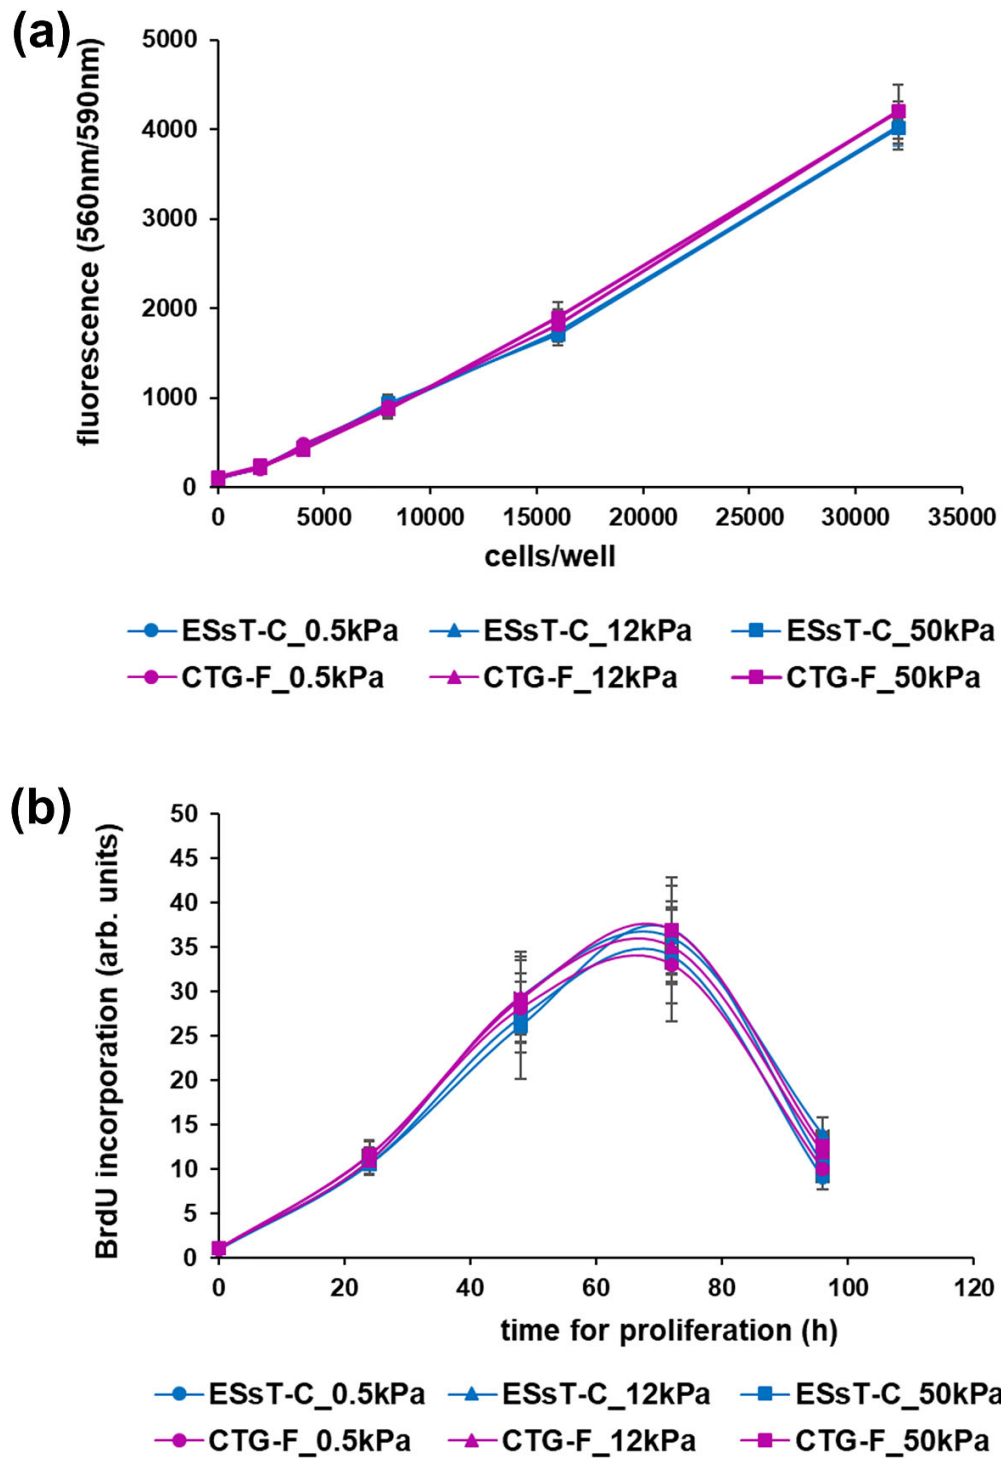

**Figure S4.** No significant changes in cell viability and proliferation of primary ESsT-Cs and CTG-Fs grown on soft (0.5 kPa) or stiff (12 or 50 kPa) matrices. ESsT-Cs and CTG-Fs were cultured on fibronectin-coated polyacrylamide hydrogels of defined stiffness as described in Figure 5a in the main text, and then subjected to the CellTiter-Blue Cell Viability assay (a) and the BrdU Cell Proliferation ELISA (b) according to the manufacturers' protocols.



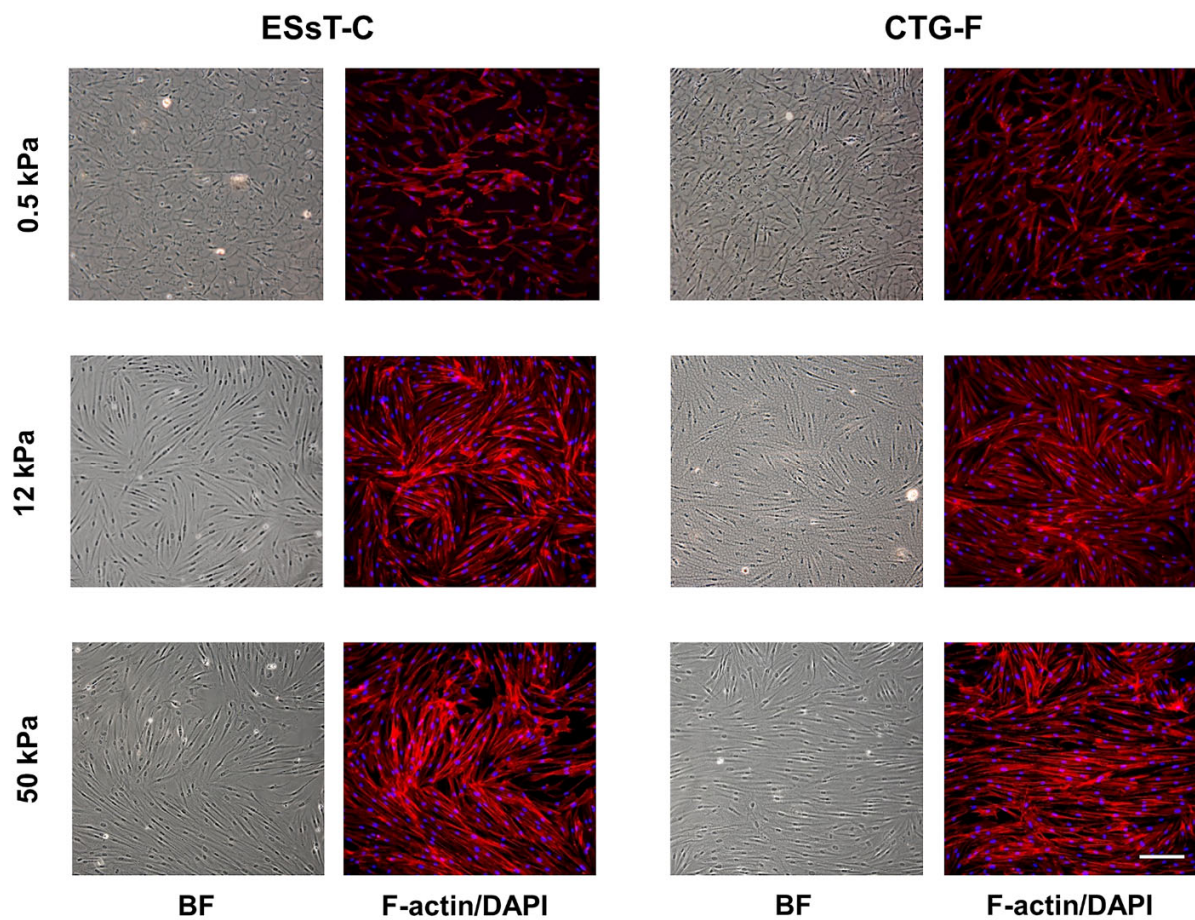

**Figure S5.** Morphological appearance and actin stress fiber formation in primary ESsT-Cs and CTG-Fs grown on soft (0.5 kPa) or stiff (12 or 50 kPa) matrices. Primary ESsT-Cs and CTG-Fs were cultured on fibronectin-coated polyacrylamide hydrogels of defined stiffness as described in Figure 5a, fixed, and stained with tetramethylrhodamine (TRITC)-labeled phalloidin (red) for actin stress fibers. The cell nuclei were localized via DAPI co-stain (blue); a bright field (BF) image is also shown. Scale bar, 500  $\mu\text{m}$ .

**Table S1:** Primer sequences for osteogenesis marker genes.

| Gene symbol | Primer pair (fwd/rev)                                            |
|-------------|------------------------------------------------------------------|
| COL1A1      | 5' -GAAGGGACACAGAGGTTTCAG-3 '<br>5' -TAGCACCATCATTTCCACGA-3 '    |
| SPP1        | 5' -ATGACACTGATGATTCTCACCA-3 '<br>5' -GCATCAGGGTACTGGATGTC-3 '   |
| RUNX2       | 5' -AGACCAACAGAGTCATTTAAGGC-3 '<br>5' -GGTGTCCTGTGCTGAAGAG-3 '   |
| ALPL        | 5' -TGGCAACTCTATCTTTGGTCTG-3 '<br>5' -TTGTTGTGAGCATAGTCCACC-3 '  |
| DLX5        | 5' -TTCCAAGCTCCGTTCCAGAC-3 '<br>5' -GAATCGGTAGCTGAAGACTCG-3 '    |
| IBSP        | 5' -GGAATGGCCTGTGCTTTCTC-3 '<br>5' -AGTCACTACTGCCCTGAACTG-3 '    |
| BGLAP2      | 5' -GTGCAGAGTCCAGCAAAGGT-3 '<br>5' -TCAGCCAACTCGTCACAGTC-3 '     |
| PHEX        | 5' -TTTCTTCCGGTTCGCTTGTGA-3 '<br>5' -AGTTCCTTCAACTTGAGGTCAAC-3 ' |
| GAPDH*      | 5' -ATCAAGAAGGTGGTGAAGCAG-3 '<br>5' -TCGTTGTCATACCAGGAAATGAG-3 ' |

\*reference gene used for normalization in all qPCR analyses

**Table S2:** Primer sequences for genes encoding extracellular matrix proteins.

| Gene symbol | Primer pair (fwd/rev)                                             |
|-------------|-------------------------------------------------------------------|
| COL1A2      | 5' -TGGACCTCCTGGTAATCCTG-3 '<br>5' -GCTCACCAACAAGTCCTCTG-3 '      |
| COL3A1      | 5' -AAGGAAATGATGGTGCTCCTG-3 '<br>5' -AGCCTTGTAATCCTTGTGGAC-3 '    |
| POSTN       | 5' -ACTCCTCTATCCAGCAGACAC-3 '<br>5' -TAATTGGCTTATAGACAGTCACGG-3 ' |
| FN1         | 5' -TGCAGGTCCAGATCAAACAG-3 '<br>5' -TCCACATCAGTGAATGCCAG-3 '      |

|     |                                |
|-----|--------------------------------|
| VIM | 5' -TGAACCTGAGGGAACTAATCTG-3'  |
|     | 5' -TCGTTGATAACCTGTCCATCTC-3'  |
| TNC | 5' -GAGGGTGACCACCACACGCTT-3'   |
|     | 5' -CAAGGCAGTGGTGTCTGGACATC-3' |

**Table S3:** Primer sequences encoding isoforms of FGF and BMP and their receptors.

| Gene symbol | Primer pair (fwd/rev)           |
|-------------|---------------------------------|
| FGF2        | 5' -ACATCAAGCTACAACCTCAAGC-3'   |
|             | 5' -CCGTAACACATTTAGAAGCCAG-3'   |
| FGFR1       | 5' -CTGTGAAGATGTTGAAGTCGG-3'    |
|             | 5' -ACATACAAGGGACCATCCTG-3'     |
| FGFR2       | 5' -CAAGAGATAAGCTGACACTGGG-3'   |
|             | 5' -CATCATCTTTCAACATCTTCACGG-3' |
| FGFR3       | 5' -AAGATGCTGAAAGACGATGCC-3'    |
|             | 5' -TACTCCACCAGCACGTACAG-3'     |
| FGFR4       | 5' -TGAGTCTAGATCTACCTCTCGAC-3'  |
|             | 5' -TCAGAGGCGTTGTCTTTGAG-3'     |
| BMP2        | 5' -CCACCATGAAGAATCTTTGGA-3'    |
|             | 5' -AGCATCTTGCATCTGTTCTC-3'     |
| BMP4        | 5' -CACCACGAAGAACATCTGGAG-3'    |
|             | 5' -AATGTTTATACGGTGGAAGCCC-3'   |
| BMP7        | 5' -GTCAACCTCGTGGAACATGAC-3'    |
|             | 5' -AAGAGATCCGATTCCCTGCC-3'     |
| BMPR1A      | 5' -TCGTTGTATCACAGGAGGGA-3'     |
|             | 5' -ACTGCTCGTAGACATTCATCAC-3'   |
| BMPR1B      | 5' -TGTGTATCAGGAGGTATAGTGG-3'   |
|             | 5' -CTTAGACACTCATCACTGCTC-3'    |
| BMPR2       | 5' -AACACCACTCAGTCCACCTC-3'     |
|             | 5' -CGGTCTCCTGTCAACATTCTG-3'    |
| ACVR1       | 5' -TGAGCAATGGTATAGTGGAGG-3'    |
|             | 5' -AGGTTAATGTCGGGTCTGAG-3'     |



**Table S4:** Primer sequences encoding isoforms of TGF- $\beta$  and IGF and their receptors.

| Gene symbol | Primer pair (fwd/rev)                                                |
|-------------|----------------------------------------------------------------------|
| TGFB1       | 5' -AACCCACAACGAAATCTATGAC-3 '<br>5' -GGAATTGTTGCTGTATTTCTGG-3 '     |
| TGFB2       | 5' -GATTTGCAGGTATTGATGGCAC-3 '<br>5' -TTTCTAAAGCAATAGGCCGCA-3 '      |
| TGFB3       | 5' -GAGCTCTTCCAGATCCTTCG-3 '<br>5' -TTTCTAGACCTAAGTTGGACTCTC-3 '     |
| TGFBR1      | 5' -TAGTATTCTGGGAAATTGCTCGAC-3 '<br>5' -CTCTCAAGGCTTCACAGCTC-3 '     |
| TGFBR2      | 5' -GTGGCTGTATGGAGAAAGAATGAC-3 '<br>5' -AACACATGAAGAAAGTCTCACCAG-3 ' |
| IGF1        | 5' -TTTATTTCAACAAGCCACAGG-3 '<br>5' -GCTGATACTTCTGGGTCTTGG-3 '       |
| IGF2        | 5' -CCTGGACAATCAGACGAATTCTC-3 '<br>5' -CATTGGTGTCTGGAAGCCG-3 '       |
| IGFR1       | 5' -GAGCCTCCTGTGAAAGTGAC-3 '<br>5' -CATCCTGCCCATCATACTCTG-3 '        |
| IGF2R       | 5' -CACCATTCCCAAACACAG-3 '<br>5' -AATATAGGATGAACCTCCGCTC-3 '         |
